# Supplementary material
Source: Springer Nature journal article supplement (https://www.springermedizin.de/resource/supplementary/12874_2010_442_MOESM2_ESM.pdf/9432108)

**Prospective Studies**

**Geographical area**

**Retrospective Study**

**Study 1**

**Community (UK)**

**Telephone Survey**

**Study 2**

**Prospective Cohort  
84 General Practices (UK)**

**Study 3**

**GP Presentation Study  
(collecting samples from every case)**

**42 General Practices (UK)**

**Study 4**

**Validation Study**

**Study 5**

**GP Enumeration Study  
(observing current clinical practice, not necessarily collecting samples in every case).**

**42 General Practices (UK)**

**Study 6**

**Microbiology Study  
(Laboratory -based)**

**State of the art tests**

**Routine tests at local laboratory**

**Positive**

**Negative**

**Study 7**

**Calibration Study  
(National reporting study)**

**Official Statistics**

**Yes**

**No**

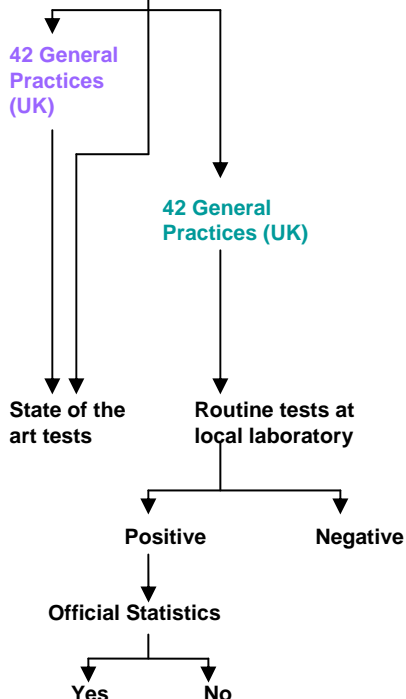

Supplement: MOESM2 [file 9432108]
